# Supplementary material for: A versatile matrix of an ionic liquid functionalized with aldehyde and ferrocene groups for label-free electrochemical immunosensors
Source: Royal Society of Chemistry journal article supplement (doi:10.1039/c8ay00108a), 2018-01-01
Supplement: c8ay00108a1.pdf [file c8ay00108a1.pdf]

## Supporting Information

### **A Versatile Matrix of Ionic Liquid Functionalized with Aldehyde and Ferrocene for Label-Free Electrochemical Immunosensors**

Youming Shen,<sup>ab</sup> Guangyu Shen,<sup>\*a</sup> Youyu Zhang,<sup>\*b</sup>

<sup>a</sup> Hunan Province Cooperative Innovation Center for The Construction & Development of Dongting Lake Ecological Economic Zone, College of Chemistry and Materials Engineering, Hunan University of Arts and Science, Changde, 415000, PR China

<sup>b</sup> Key Laboratory of Chemical Biology and Traditional Chinese Medicine Research (Ministry of Education), College of Chemistry and Chemical Engineering, Hunan Normal University, Changsha 410081, PR China

---

\* Corresponding author: E-mail: sgyrab@163.com; Tel.: +867367186115

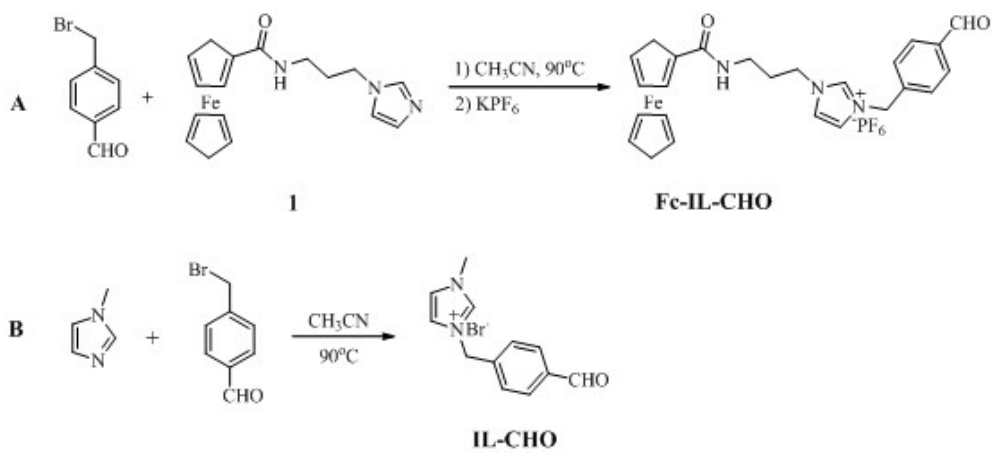

**Figure S1** Synthetic route for Fc-IL-CHO (A) and IL-CHO (B).

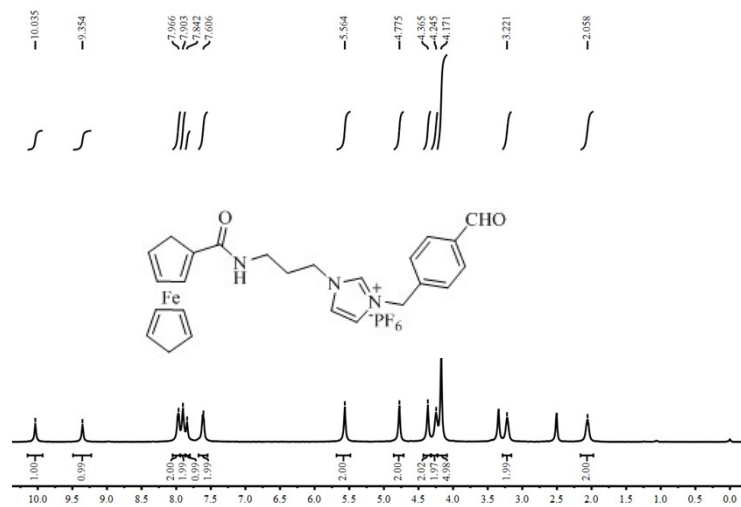

Figure S2 <sup>1</sup>H NMR of compound Fe-IL-CHO

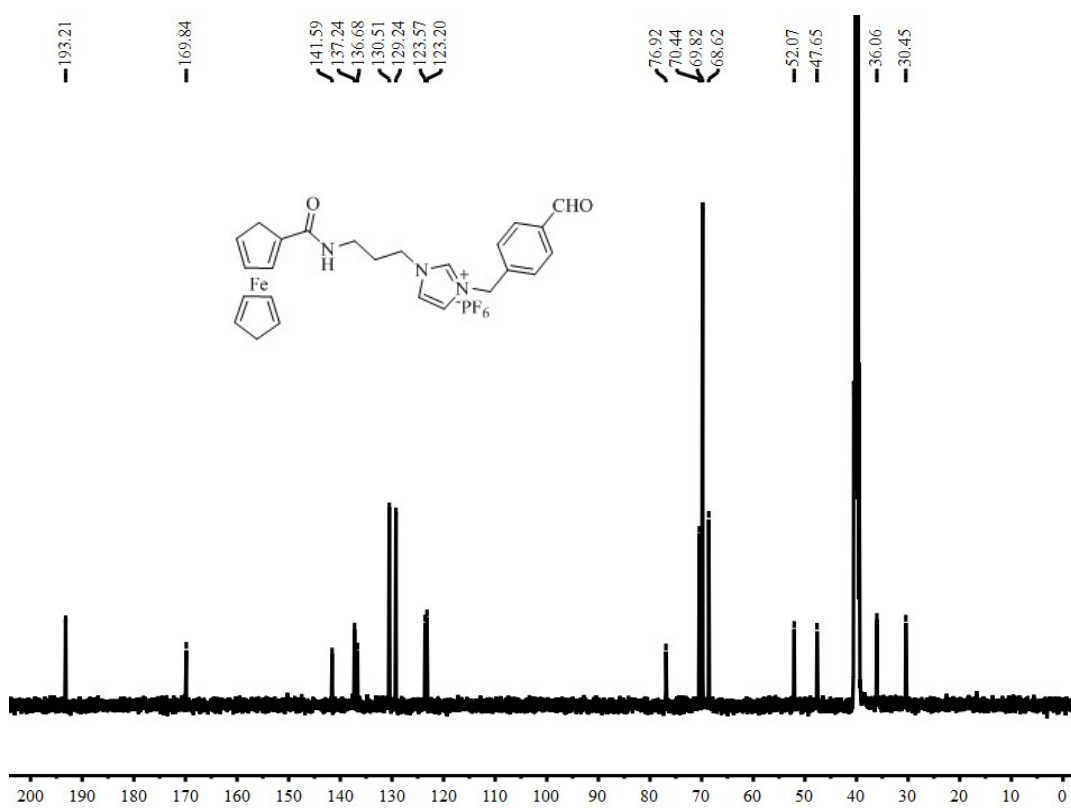

Figure S3 <sup>13</sup>C NMR of compound Fe-IL-CHO

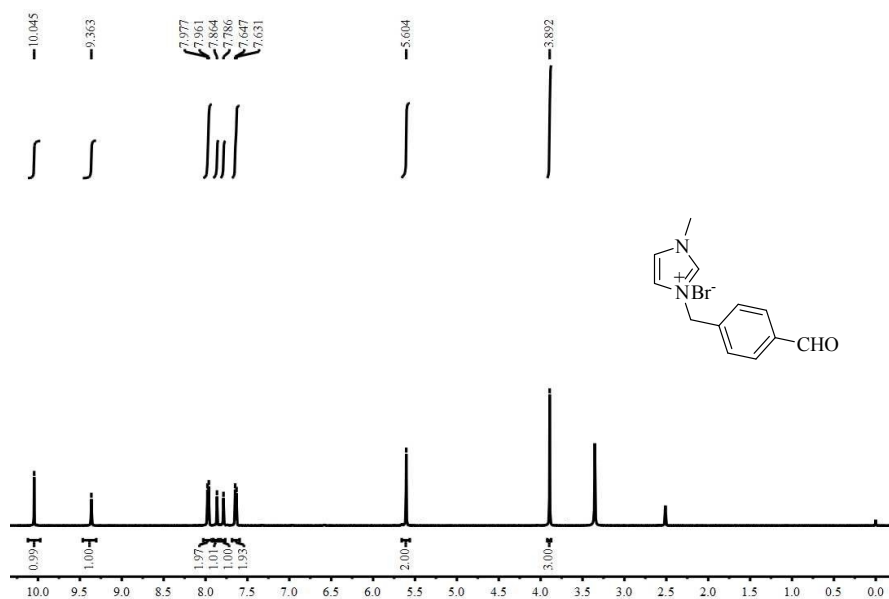

Figure S4  $^1\text{H}$  NMR of compound IL-CHO

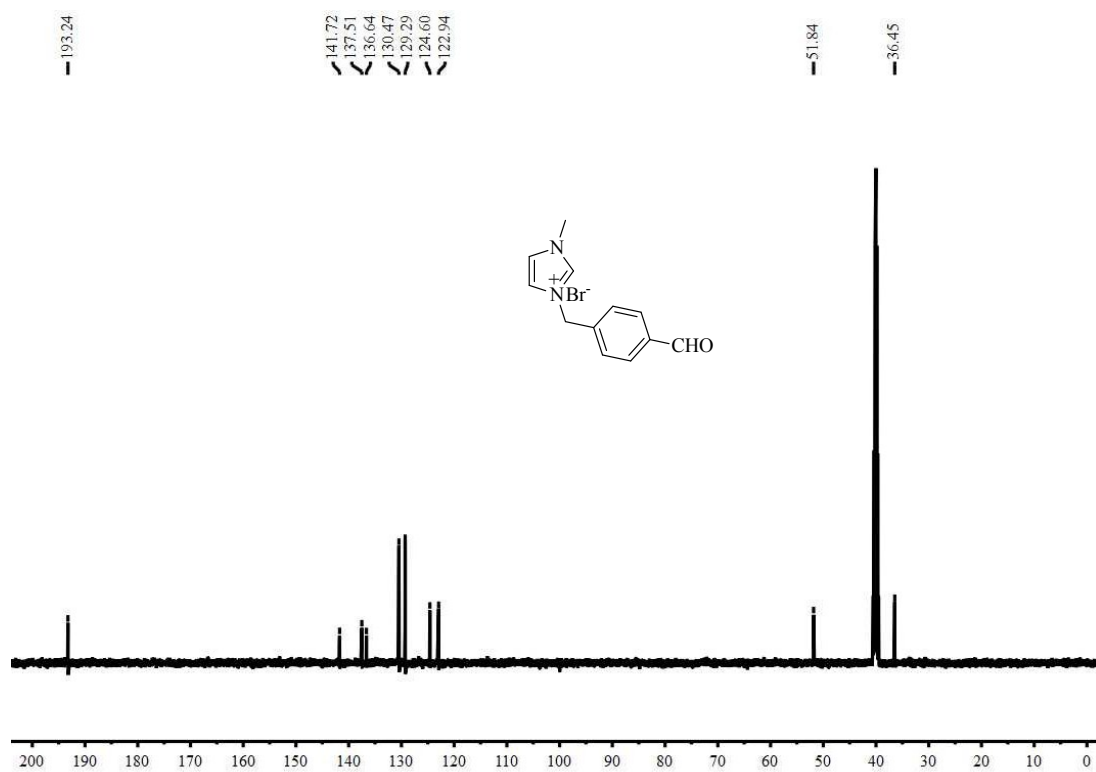

Figure S5  $^{13}\text{C}$  NMR of compound IL-CHO
